# Supplementary material for: Chemical entrapment and killing of insects by bacteria
Source: PubMed Central journal article supplement (PMC7490686; doi:10.1038/s41467-020-18462-0), 2020-09-14
Supplement: 41467_2020_18462_MOESM3_ESM.pdf [file 41467_2020_18462_MOESM3_ESM.pdf]

## **Description of Additional Supplementary Files**

File Name: Supplementary Movie 1

Description: Fruit flies are repelled by high concentrations of pure 2-MIB. Three hour video timelapse showing ~50 adult flies subject to a Y-maze choice assay. Flies were given a choice to move towards a tube containing a Whatman paper absorbed with 100  $\mu$ L of mineral oil, or 5 mg of 2-MIB dissolved in the same amount of mineral oil.
